# Supplementary material for: iTRAQ-Based Quantitative Proteomic Analysis of Embryogenic and Non-embryogenic Calli Derived from a Maize (Zea mays L.) Inbred Line Y423
Source: MDPI journal article supplement (doi:10.3390/ijms19124004), 2018-12-12
Supplement: s1 [file s1]

**Table S1 Primers of qRT-PCR**

| <b>TDFs</b>       | <b>RT-PCR forward primer(5'-3')</b> | <b>RT-PCR reverse primer(5'-3')</b> |
|-------------------|-------------------------------------|-------------------------------------|
| UP76              | AAGGCTCCAGTCTACCCACG                | AGCGTTGTTTGGGGCAAG                  |
| UP12              | TAGCAGCGTCGTAGTCGTGAT               | TGGCTCATCATCTTCGGCT                 |
| UP250             | CGGAAATACAACCAGGGACTCA              | CTTGTGGAGGAGCGGTGCA                 |
| UP322             | TGGAGTTCACTTGGATTGGATTC             | AGCGAACATACAGCAACCCAG               |
| UP316             | GCTTCGTGCGGGCTCAA                   | CCCAACAACCCCAGCCT                   |
| UP108             | TCTTTCCTGAACCTGAGCCAC               | ACAACGACCTCTGCGGGA                  |
| UP292             | CCGCTTTCCCCGTGGTT                   | GGAGTGCCGCTTCCCTGAT                 |
| UP283             | CCCAACGCTCCGCTGTA                   | CGGCTTCTCCCACTCGC                   |
| DOWN60            | CTGCTGGGTGGACATCGCT                 | TTCCAGACCCCAGCAAGCC                 |
| DOWN90            | CGGACGCCGTGCTTGAC                   | CCAGGGCCACATGTTCGG                  |
| DOWN1             | GATGGCTGCCCCAACAC                   | AGCGACTAAATCTGGACTACCA              |
| DOWN205           | TCTTCCTCGCCAGCAACC                  | GGACACGACAGCAAAACAGC                |
| Actin1            | CGATTGAGCATGGCATTGTCA               | CCCCTAGCGTACAACGAA                  |
| $\alpha$ -tubulin | ACTTCATGCTTTCGTCCTACGCTCCA          | CTGGGAGGCTGGTAGTTGATTC              |
